# Supplementary material
Source: Springer Nature journal article supplement (https://www.springermedizin.de/resource/supplementary/12967_2013_1732_MOESM6_ESM.pdf/9575180)
Supplement: MOESM6 [file 9575180]

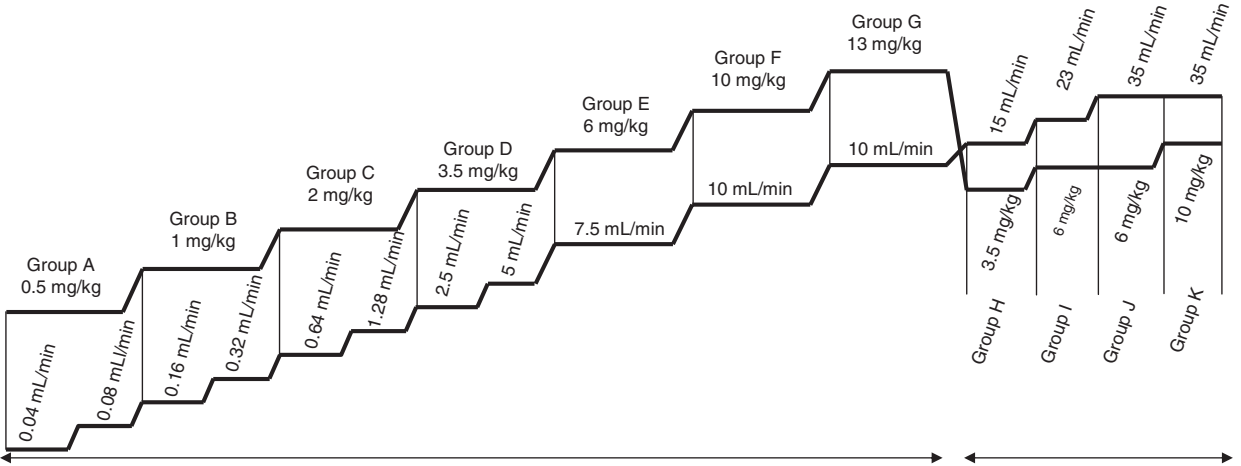

Groups A to G:

- 1- Dose escalation: In each group N=8 (TRO40303 N=6 or placebo N=2)
- 2- Flow rate escalation: In each sub-group N=4 (TRO40303 N=3 or placebo N=1)

Groups H to K: In each group N=4 (TRO40303 N=3 or placebo N=1)
